# Supplementary material for: Dexmedetomidine expands monocytic myeloid-derived suppressor cells and promotes tumour metastasis after lung cancer surgery
Source: Springer Nature journal article supplement (doi:10.1186/s12967-018-1727-9), 2018-12-01
Supplement: MOESM1 [file 16332936]

## Additional file 1: Figure S1

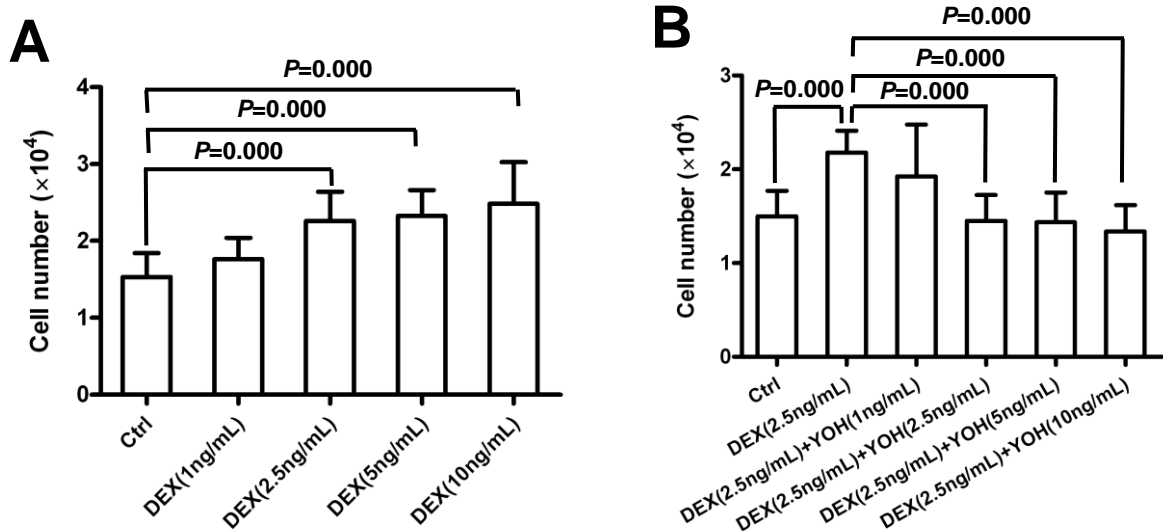

**Additional file 1: Figure S1. Expansion of M-MDSC by dexmedetomidine is inhibited by yohimbine.** (A-B) CD11b<sup>+</sup>CD33<sup>+</sup>HLA-DR<sup>-</sup> cells ( $3 \times 10^4$  cells/well) isolated from lung cancer patients (n = 6) 24 hours after surgery were cocultured with (A) dexmedetomidine (DEX) or (B) dexmedetomidine and yohimbine (DEX+YOH). Twenty-four hours after coculture, floating cells were collected and numerated using an automated cell counter. The percentage of CD11b<sup>+</sup>CD33<sup>+</sup>HLA-DR<sup>-</sup>CD14<sup>+</sup> (M-MDSC) was analyzed by flow cytometry and the absolute number of M-MDSC was calculated.
