# Supplementary material for: Dexmedetomidine expands monocytic myeloid-derived suppressor cells and promotes tumour metastasis after lung cancer surgery
Source: Springer Nature journal article supplement (doi:10.1186/s12967-018-1727-9), 2018-12-01
Supplement: MOESM2 [file 16332936]

## Additional file 2: Figure S2

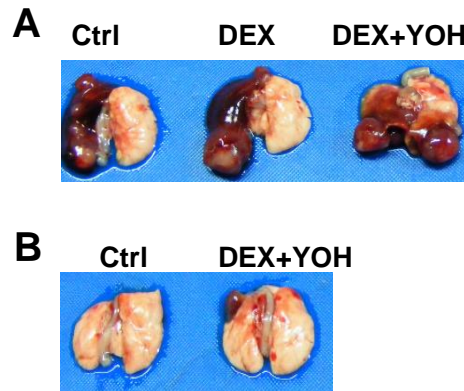

**Additional file 2: Figure S2. DEX promotes tumour metastases in mice exposed to tumour excision.**  $1 \times 10^6$  LLC cells were injected s.c. into the dorsa of C57BL/6 mice. When tumors were  $1,500 \text{ mm}^3$  in size, the mice were divided into 3 groups and treated with PBS (Ctrl group), dexmedetomidine (DEX group), or dexmedetomidine and yohimbine (DEX+YOH group). Then the mice immediately underwent surgical removal of the tumor. **A.** When the mice showed dyspnea, they were euthanized and their lungs were removed. **B.** On day 60 after tumor resection, the survived mice from Ctrl and DEX+YOH group were euthanized and their lungs were removed.
